# Supplementary material for: FeS2-based aerogel as a flexible low-cost substrate for rapid SERS detection of histamine in biofluids
Source: Royal Society of Chemistry journal article supplement (doi:10.1039/d3nj01736b), 2023-01-01
Supplement: d3nj01736b1.pdf [file d3nj01736b1.pdf]

## Supplementary Information(S.I)

# FeS<sub>2</sub> based aerogel as a flexible low-cost substrate for rapid SERS detection of histamine in biofluids

Anjali Sreekumar<sup>1</sup>, Lignesh Durai<sup>1</sup>, Minu Thomas, Sushmee Badhulika<sup>1\*</sup>

<sup>1</sup>*Department of Electrical Engineering, Indian Institute of Technology, Hyderabad 502285, India.*

\*Corresponding author: E-mail: sbadh@iith.ac.in; Telephone: +040-23016467

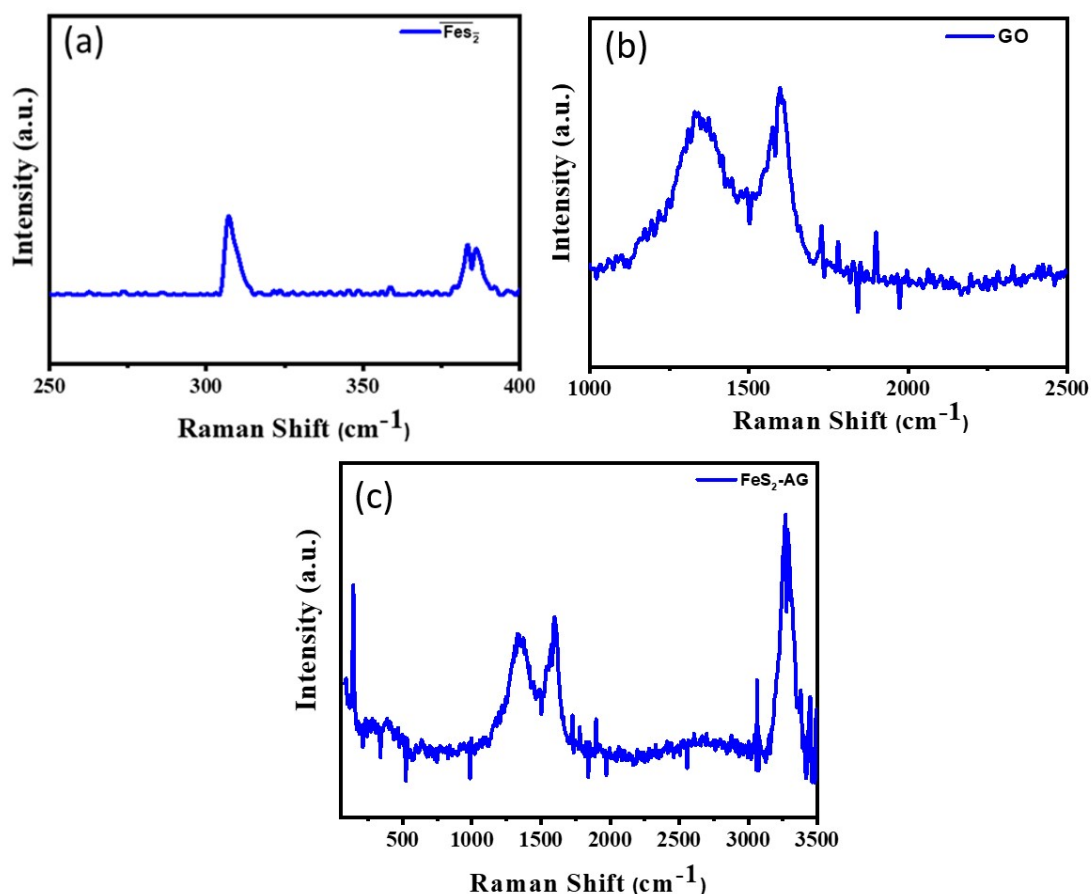

Fig. S1 Raman Spectra of (a) FeS<sub>2</sub> (b) GO (c) FeS<sub>2</sub>- AG

Fig.S1 (a) depicts the Raman spectra of FeS<sub>2</sub>. The Raman spectrum of FeS<sub>2</sub> typically shows several distinct bands that can be attributed to the vibrational modes of the molecule. One of the most prominent peaks in the Raman spectrum of FeS<sub>2</sub> occurs at around 370 cm<sup>-1</sup>, and is typically attributed to the Fe-S stretching mode, respectively. Fig. S1 (b) represents the Raman spectra of GO. One of the most well-known features of the Raman spectra of GO is the D-band, which is located at around 1350 cm<sup>-1</sup>. This peak arises from the breathing mode of sp<sup>2</sup> carbon atoms in the GO lattice that have been disrupted by the introduction of sp<sup>3</sup> carbon atoms or defects. Another important peak in the Raman spectra of GO is the G-band, which is located at 1590 cm<sup>-1</sup>. This peak arises from the stretching mode of sp<sup>2</sup> carbon atoms in the GO lattice and is a measure of the degree of graphitization or order in the GO structure.

Fig.S1 (c) depicts the Raman spectra of FeS<sub>2</sub>-AG. In addition to the characteristic GO peaks, there are prominent peaks corresponding to polyvinyl alcohol (PVA). The peak at 3500 cm<sup>-1</sup>, corresponds to the presence of PVA as a significant component in the sample which corresponds to the hydroxyl (-OH) stretching vibrations of the PVA polymer. The hydroxyl (-OH) group in PVA exhibits characteristic vibrational modes, and one of these modes is the stretching vibration. When the PVA polymer is excited by the incident laser light, the -OH groups vibrate at specific frequencies. These vibrations result in the absorption or scattering of light at corresponding wavelengths, which can be observed in the Raman spectrum. This peak confirms the significant presence of PVA in the sample, likely as a component of the FeS<sub>2</sub>-AG aerogel material.

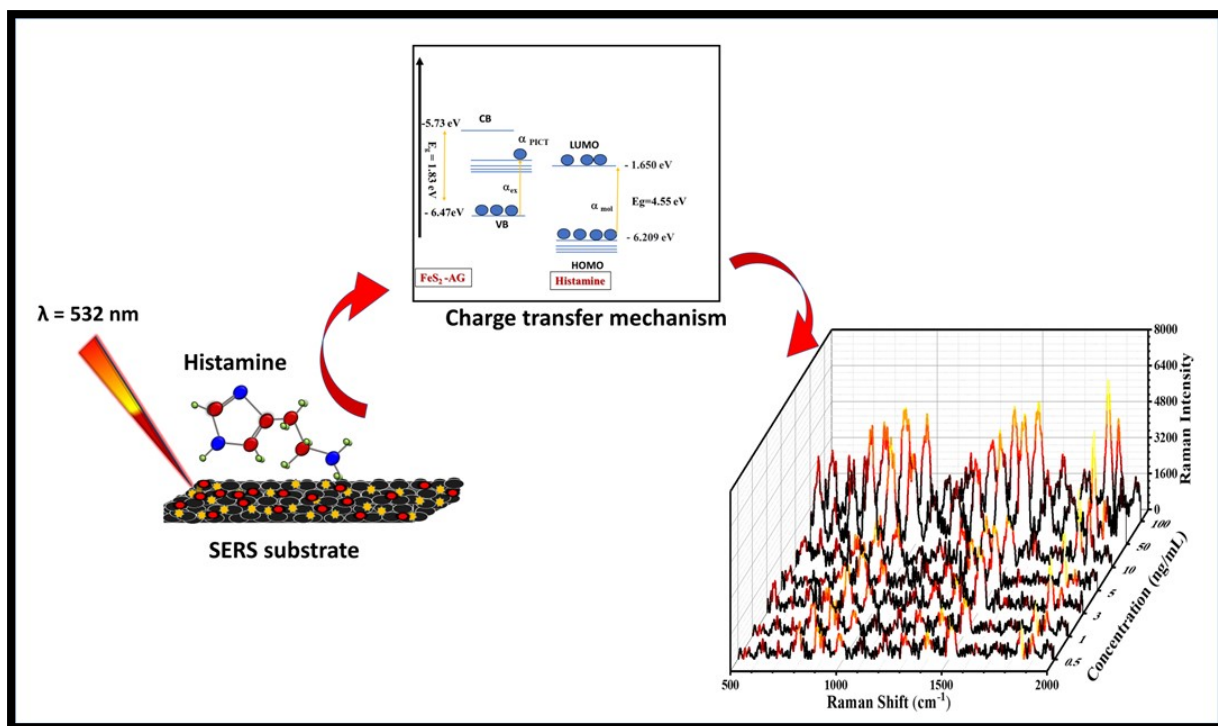

Scheme 1: SERS-enhanced mechanism for detection of histamine.

Table S1. SERS peak assignment of MB on FeS<sub>2</sub> – AG

| Wave number (cm <sup>-1</sup> ) | Raman Intensity | SERS Intensity with Substrate | Assignments                      |
|---------------------------------|-----------------|-------------------------------|----------------------------------|
| 546                             | -               | ~ 1364                        | ν(S-S)                           |
| 619                             | ~ 83            | ~ 1699                        | ν(CC) alicyclic chain vibrations |
| 694                             |                 | ~ 1277                        | ν(CC) alicyclic chain vibrations |

|             |              |               |                                                 |
|-------------|--------------|---------------|-------------------------------------------------|
|             |              |               |                                                 |
| 753         | ~ 80         | ~ 1584        | $\nu(\text{CC})$ alicyclic chain vibrations     |
| 793         | ~ 131        | ~ 1373        | $\nu(\text{C-C-C})$                             |
| 882         |              | ~ 2042        | $\nu(\text{CC})$ alicyclic chain vibrations     |
| 901         |              | ~ 2255        | $\nu(\text{C-C-C})$                             |
| 987         | ~ 196        | ~ 2058        | $\nu(\text{C-C-C})$                             |
| 1183        | ~ 118        | ~ 1248        | $\nu(\text{CC})$ alicyclic chain vibrations     |
| 1284        | ~ 305        | ~ 2229        | $\nu(\text{CC})$ alicyclic chain vibrations     |
| 1404        | ~ 77         | ~ 2249        | $\delta(\text{CH}_3)$                           |
| 1512        | ~ 458        | ~ 2210        | $\nu(\text{C=O})$                               |
| 1594        | ~ 214        | ~ 1634        | $\nu(\text{C=N})$                               |
| <b>1844</b> | <b>~ 253</b> | <b>~ 3662</b> | <b><math>\nu(\text{C}\equiv\text{N})</math></b> |
| 1891        | ~ 91         | ~ 3072        | $\nu(\text{C}\equiv\text{N})$                   |

|  |  |  |  |
|--|--|--|--|
|  |  |  |  |
|--|--|--|--|

**Table S2 Detection of histamine in simulated blood serum samples via standard addition technique.**

| <b>Concentration<br/>in blood<br/>serum<br/>(ng/ mL)</b> | <b>Spiked<br/>Concentration<br/>(ng/ mL)</b> | <b>Recovered<br/>Concentration<br/>(ng/ mL)</b> | <b>RSD<br/>%</b> | <b>Recovery<br/>%</b> |
|----------------------------------------------------------|----------------------------------------------|-------------------------------------------------|------------------|-----------------------|
| 0.5                                                      | 0.5                                          | 0.466                                           | 3.45             | 96.55                 |
| 1                                                        | 0.5                                          | 1.22                                            | 0.21             | 100.21                |
| 2                                                        | 1                                            | 2.04                                            | 10.08            | 89.92                 |
| 3                                                        | 1                                            | 3.25                                            | 0.24             | 100.24                |
| 4                                                        | 1                                            | 3.76                                            | 2.42             | 97.58                 |
